# Supplementary material for: Specific identification of human transferrin conformations using a cyanine dye supramolecular assembly
Source: Royal Society of Chemistry journal article supplement (doi:10.1039/c7ra04272h), 2017-01-01
Supplement: c7ra04272h1.pdf [file c7ra04272h1.pdf]

# Specific Identification of Human Transferrin Conformations by Using Cyanine Dye Supramolecular Assembly

Xiufeng Zhang,\* Ling Lan, Shu Yang, Yulan Rui, Qian Li, Hongbo Chen, Xin Sun, Qianfan Yang,\* Yalin Tang\*

**Abstract:** A new method to recognize human transferrin (*Tf*) conformation was developed by cyanine dye supramolecular assembly. We achieved to detect the open conformation of *Tf* (*apo-Tf*) in sub-micromolar level against the closed one (*holo-Tf*). It as a protein conformatinal probe can also monitor the transformation between the two conformations of *Tf*.

## Table of Contents

|                                                                                                        |   |
|--------------------------------------------------------------------------------------------------------|---|
| Materials and sample preparation .....                                                                 | 2 |
| Experimental section .....                                                                             | 2 |
| The absorption spectra of MTC with different conformational Tf and the detection limit of apo-Tf ..... | 2 |
| The circular dichroism spectra and the detection limit of holo-Tf .....                                | 4 |
| The absorption spectra of MTC with Tf conformation mixture and the detection limit of apo-Tf .....     | 5 |
| The absorption spectra of MTC with natural hTf .....                                                   | 6 |
| The fluorescence spectra of apo-Tf with Fe <sup>3+</sup> and monitored by MTC assembly.....            | 6 |
| References .....                                                                                       | 7 |

## Materials and sample preparation

The cyanine dye (**MTC**, 3, 3' di (3-sulfopropyl) - 4, 5, 4', 5'-dibenzo- 9-methyl - thiocarbocyanine triethylam - monium salt) is the same as the used previously.<sup>[1]</sup> Human serum transferrin (**hTf**), human apo-transferrin (**apo-Tf**) and human holo-transferrin (**holo-Tf**), collectively referred to as **Tfs**, were obtained from Sigma (T3309, T2252 and T0665, respectively) as lyophilized powders with a molecular mass of 78~80 kDa and used without further purification. Analytical grade methanol and FeCl<sub>3</sub> were purchased from Beijing Chem. Co. Ultrapure water was from a Milli-Q (Millipore) system.

The stock solution of **MTC** was prepared by dissolving **MTC** in methanol directly. The stock solutions of **Tfs** were prepared by dissolving a certain amount of chemicals directly in Tris-HCl buffer solution (10 mM, pH 6.8). FeCl<sub>3</sub> was dissolved directly in Tris-HCl buffer. Mixed **apo-Tf** and **holo-Tf** at different ratios were kept at the total protein concentration of 1 μM. The measured sample was prepared by adding **Tfs** solution into **MTC** solution at different ratios following by intense stirring for 1-2 s and then diluted to certain volume by Tris-HCl. The samples contained 5% methanol (v/v) and then were kept in darkness at 35°C for more than 2 h prior to measurement.

## Experimental section

Given the experimental error in absorbance, all experiments were repeated with at least three independent preparations on different days to ensure the results are repeatable. UV-vis absorption spectra were recorded on UV-1601PC spectrophotometer. The fluorescence spectra were taken on a Hitachi model F-7000 spectrofluorometer for aqueous solutions. Samples were detected at  $E_x=280$  nm, Slit widths: 5×5 nm and Scanning speed: 2400 nm/min. All the tests were conducted in 10 mm quartz cells. Circular dichroism spectra were carried out on a Jasco-815 spectrofluorometer. The scanning range is selected at 190-250 nm for secondary structures and 245-650 nm for **holo-Tf** characteristic feature, respectively.<sup>[2]</sup> The spectra were accumulated for three times with a band-width of 2.0 nm and a resolution of 0.5 nm. The cell path-length is 1 mm for the wavelength range 190-250 nm and 10 mm for 245-650 nm.

## The absorption spectra of MTC with different conformational Tf and the detection limit of apo-Tf

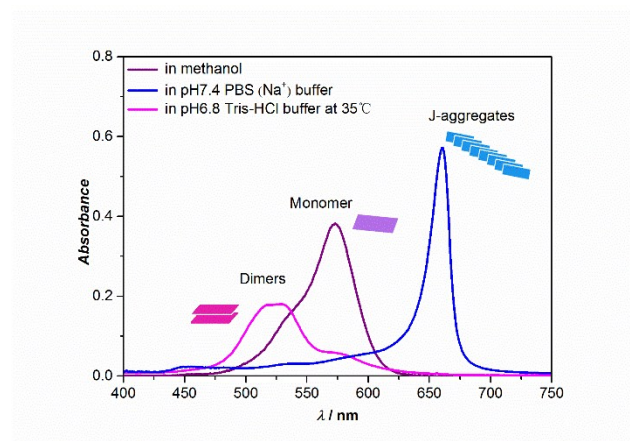

Fig. S1† The absorption spectra of cyanine dye **MTC** in different solutions.

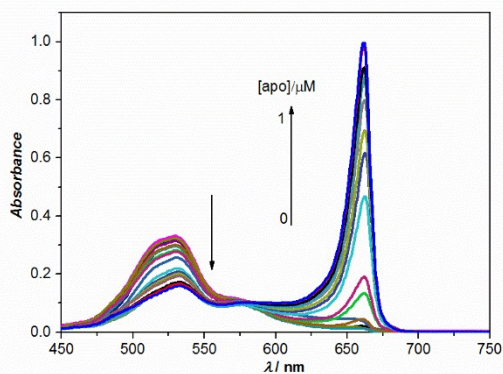

Fig. S2† The absorption spectra of **MTC** (5  $\mu\text{M}$ ) with **apo-Tf** different concentrations: 0, 0.001, 0.002, 0.003, 0.004, 0.005, 0.0075, 0.01, 0.02, 0.04, 0.05, 0.1, 0.15, 0.2, 0.25, 0.3, 0.35, 0.4, 0.5, 1  $\mu\text{M}$ .

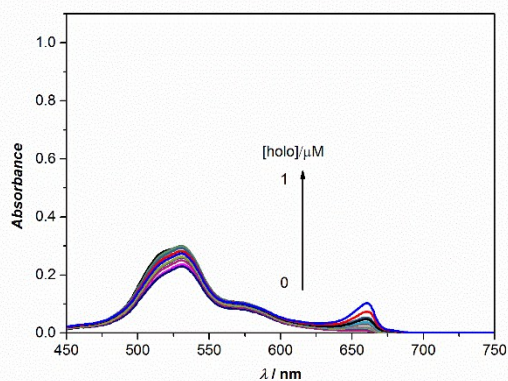

Fig. S3† The absorption spectra of **MTC** (5  $\mu\text{M}$ ) with **holo-Tf** different concentrations: 0, 0.001, 0.002, 0.003, 0.004, 0.0075, 0.01, 0.04, 0.05, 0.1, 0.2, 0.25, 0.3, 0.35, 0.4, 0.45, 0.5, 1  $\mu\text{M}$ .

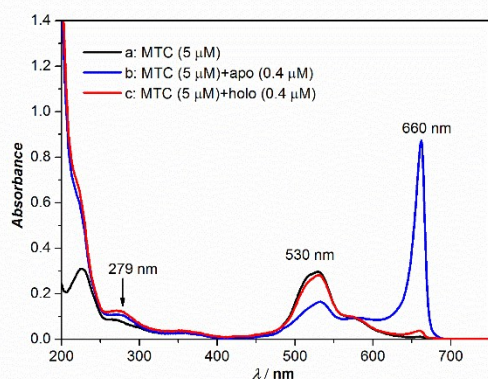

Fig. S4† The complete absorption spectrum of **MTC** (5  $\mu\text{M}$ ) in the absence and presence of **apo-Tf** (0.4  $\mu\text{M}$ ) or **holo-Tf** (0.4  $\mu\text{M}$ ), represented the all titration experiments.

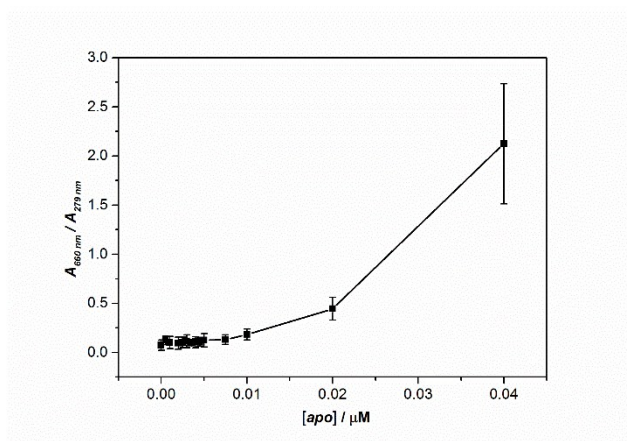

Fig. S5† The detection limit of **apo-Tf** by **MTC J-aggregates**: plots of absorption change in **MTC J-aggregates** (corrected by protein background absorption signal) against **apo-Tf** concentrations from 1 to 40 nM; Error bars are plotted as the standard deviation over three replicates.

### The circular dichroism spectra and the detection limit of holo-Tf

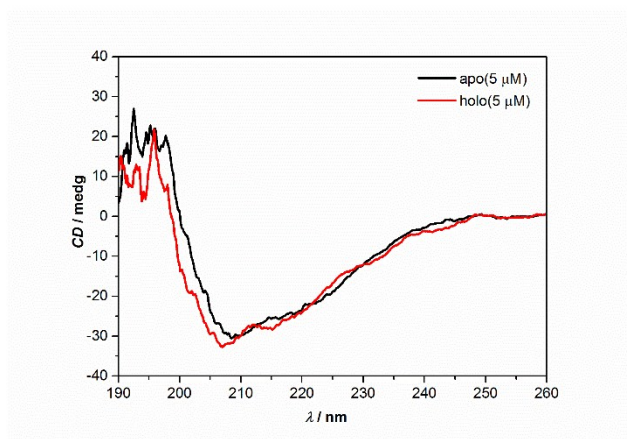

Fig. S6† The **CD** spectra of **apo-Tf** (5 μM) and **holo-Tf** (5 μM) at far **UV** region, respectively.

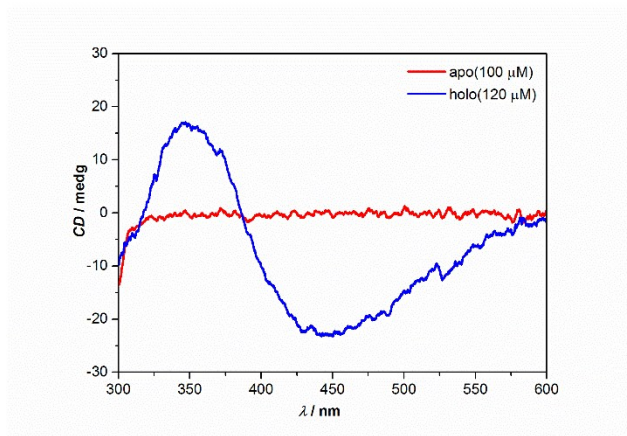

Fig. S7† The **CD** spectra of **apo-Tf** (100 μM) and **holo-Tf** (120 μM) at visible region, respectively.

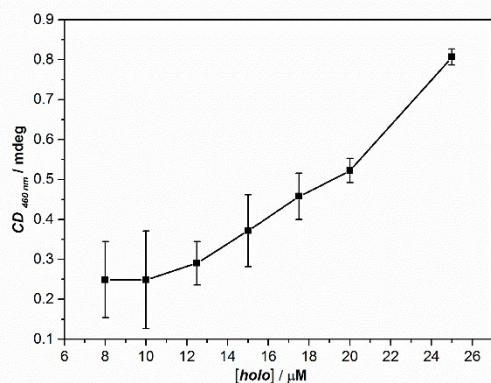

Fig. S8† The detection limit of *holo-Tf* at 460 nm by **CD** measurement; Error bars are plotted as the standard deviation over three replicates.

### The absorption spectra of MTC with Tf conformation mixture and the detection limit of apo-Tf

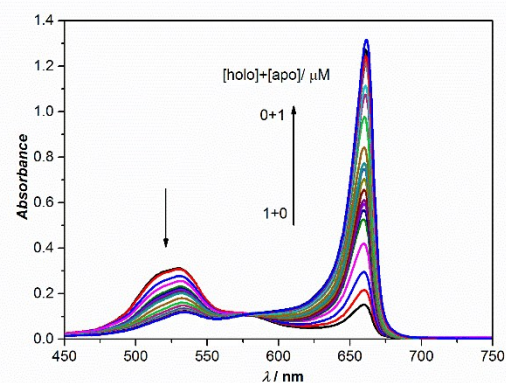

Fig. S9† The absorption spectra of *MTC* (5  $\mu\text{M}$ ) with mixed *apo-* and *holo-Tf*, where [*apo-Tf*] were from 0 to 1  $\mu\text{M}$  and [*holo-Tf*] on the contrary.

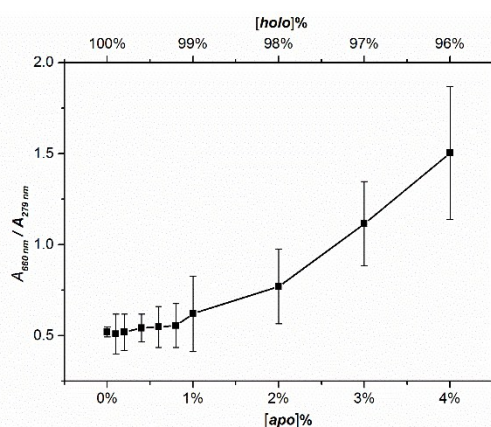

Fig. S10† The detection limit of *apo-Tf* by *MTC* J-aggregates in the mixed *apo-* and *holo-Tf*. Job plots of absorption change in *MTC* J-aggregates (corrected by protein background absorption signal) against *apo-Tf* percentage from 0% to 4% (*holo-hTf* from 100% to 96%); Error bars are plotted as the standard deviation over three replicates.



### The absorption spectra of MTC with natural hTf

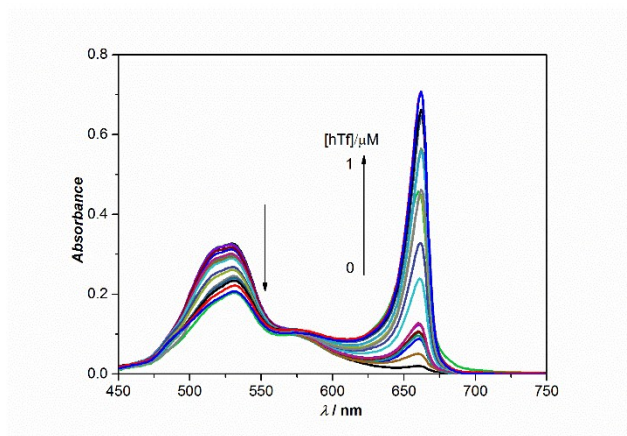

Fig. S11† The absorption spectra of **MTC** (5  $\mu\text{M}$ ) with **hTf** different concentrations: 0, 0.001, 0.002, 0.003, 0.004, 0.0075, 0.01, 0.02, 0.05, 0.1, 0.2, 0.25, 0.3, 0.4, 0.5, 0.75, 1  $\mu\text{M}$

### The fluorescence spectra of apo-Tf with Fe<sup>3+</sup> and monitored by MTC assembly

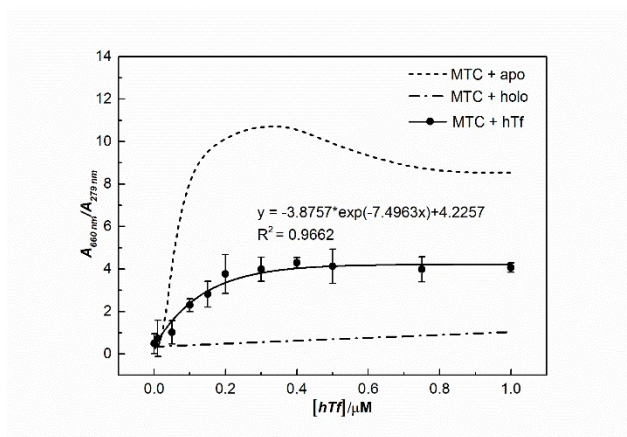

Fig. S12† Job plots of absorption change in **MTC** (5  $\mu\text{M}$ ) J-aggregates (corrected by the total protein concentration) against **hTf** concentrations from 0 to 1  $\mu\text{M}$ , respectively; Error bars are plotted as the standard deviation over three replicates.

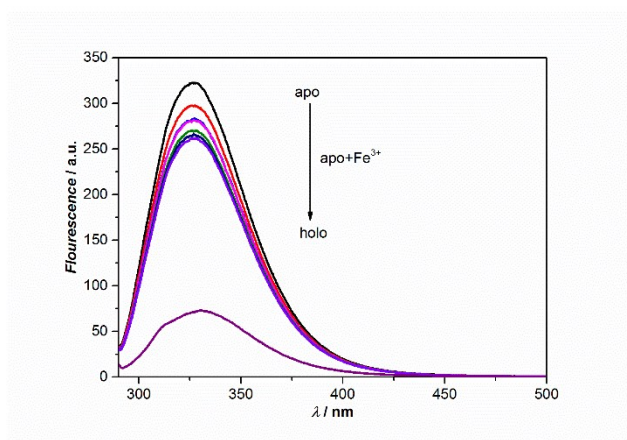

Fig. S13† The fluorescence spectra of **apo-Tf** (1  $\mu\text{M}$ ) with increasing  $\text{Fe}^{3+}$  concentrations: 0, 0.5, 1, 2, 4, 6, 8, 10, 12, 15  $\mu\text{M}$ . The purple line is **holo-Tf** (1  $\mu\text{M}$ ) alone,  $\lambda_{\text{ex}}=280$  nm.

## References

- [1] a) Y. Z. Zhang, J. F. Xiang, Y. L. Tang, G. Z. Xu and W. P. Yan. *Dyes Pigm.*, 2008, **76**, 88; b) X. F. Zhang, L. Chen, Q. F. Yang, Q. Li, X. R. Sun, H. B. Chen, G. Yang and Y. L. Tang. *Colloids Surf., A.*, 2015, **469**, 187.
- [2] a) S. Tang, R. MacColl and P. J. Parsons. *J. Inorg. Biochem.*, 1995, **60**, 175–185; b) H. Y. Du, J. F. Xiang, Y. Z. Zhang, Y. L. Tang and G. Z. Xu. *J. Photoch. Photobio.*, 2008, **195**, 127-134; c) H.Y. Du, J. F. Xiang, Y. Z. Zhang and Y. L. Tang. *Bioorg. Med. Chem. Lett.*, 2007, **17**, 1701–1704.
